# Supplementary material for: IgG from Adult Atopic Dermatitis (AD) Patients Induces Thymic IL-22 Production and CLA Expression on CD4+ T Cells: Possible Epigenetic Implications Mediated by miRNA
Source: Int J Mol Sci. 2022 Jun 20;23(12):6867. doi: 10.3390/ijms23126867 (PMC9224968; doi:10.3390/ijms23126867)
Supplement: Supplementary file 1 [file ijms-23-06867-s001.zip › Table S1.xlsx]

## Sheet: KEGG
Table S1. Pathways obtained with KEGG, and GO terms using MirWalk v3.0
Name	Hits	Pop Hits	List Total	Pop Total	Genes	Pvalue	adjusted Pvalue(BH)
hsa05202_Transcriptional_misregulation_in_cancer	5	186	46	8019	PBX3;CCNT2;HMGA2;PPARG;SIX4	0.0062	0.0124
hsa01100_Metabolic_pathways	8	1489	46	8019	ACER2;RRM2;PDE4B;CHAC1;LBR;PLPP3;SCD;NAT8L	0.6253	0.6253

## Sheet: GO-BP
Name	Hits	Pop Hits	List Total	Pop Total	Genes	Pvalue	adjusted Pvalue(BH)
GO:0007179_transforming_growth_factor_beta_receptor_signaling_pathway	7	143	104	18160	ACVR1;TGFBR3;NLK	0.0	0.0
GO:0017148_negative_regulation_of_translation	7	92	104	18160	CAPRIN2;TRIM71;FMR1;DDX3X;DDX6;IGF2BP3	0.0	0.0
GO:0045892_negative_regulation_of_transcription,_DNA-templated	21	647	104	18160	RBFOX2;PHF12;CREBZF;MIDEAS;CBX5;CRY2;ZBTB4;USP47;HMGA2;PHC3;PPARG;IKZF4;MAP3K10;MBD2;RLIM;SIX4	0.0	0.0
GO:0030308_negative_regulation_of_cell_growth	5	128	104	18160	CAPRIN2;DDX3X;PPARG;ADIPOR2;DCBLD2	0.0012	0.0063
GO:0006397_mRNA_processing	5	157	104	18160	RBFOX2;PTBP3;FMR1;QKI;PDE12	0.0028	0.0118
GO:0090263_positive_regulation_of_canonical_Wnt_signaling_pathway	5	166	104	18160	CAPRIN2;DDX3X;GSKIP;USP47;TBL1XR1	0.0035	0.0122
GO:0016579_protein_deubiquitination	7	350	104	18160	ESR1;MDM4;YOD1;USP47;INO80D	0.0056	0.0147
GO:0051301_cell_division	7	351	104	18160	SPART;CCNT2;CDC6;SMC1A;HMGA2;ARF6	0.0056	0.0147
GO:0006974_cellular_response_to_DNA_damage_stimulus	6	281	104	18160	ACER2;NABP1;CBX5;ZBTB4;FMR1;USP47	0.0073	0.017
GO:0006355_regulation_of_transcription,_DNA-templated	8	533	104	18160	ESR1;PHF12;ZBTB4;KRBOX4;ZNF268;HMGA2;NLK	0.0156	0.0248
GO:0006468_protein_phosphorylation	8	546	104	18160	WNK3;ACVR1;CDK8;MAP3K9;CDK19;NLK	0.0177	0.0248
GO:0035556_intracellular_signal_transduction	7	416	104	18160	WNK3;RAB40C;DDX3X;TGFBR3;NLK	0.0132	0.0248
GO:0043066_negative_regulation_of_apoptotic_process	8	544	104	18160	WNK3;ZNF268;DDX3X;MDM4;USP47;HMGA2;ARL6IP1;SIX4	0.0173	0.0248
GO:0043161_proteasome-mediated_ubiquitin-dependent_protein_catabolic_process	5	234	104	18160	SPOPL;TRIM71;TRIM2;TBL1XR1	0.0136	0.0248
GO:0045893_positive_regulation_of_transcription,_DNA-templated	10	752	104	18160	ESR1;TCF4;ACVR1;NFIB;HMGA2;TBL1XR1;PPARG;SIX4	0.0162	0.0248
GO:0010629_negative_regulation_of_gene_expression	5	272	104	18160	ESR1;TNRC6B;AGO1;ADIPOR2;SMCR8	0.0239	0.0314
GO:0043065_positive_regulation_of_apoptotic_process	6	393	104	18160	ZNF268;DDX3X;MAP3K9;HMGA2;CDK19;MAP3K10	0.0308	0.038
GO:0007399_nervous_system_development	5	330	104	18160	RBFOX2;TCF4;FMR1;ARF6;IGF2BP3	0.0473	0.0552
GO:0030154_cell_differentiation	7	611	104	18160	SMOC1;TCF4;ZNF268;DDX3X;PPARG;ARF6;PURB	0.0721	0.0797
GO:0010628_positive_regulation_of_gene_expression	5	466	104	18160	TNRC6B;DDX3X;HMGA2;QKI;AGO1	0.1401	0.1471
GO:0016567_protein_ubiquitination	5	678	104	18160	SPOPL;RAB40C;RLIM;KLHL15	0.357	0.357

## Sheet: GO-CC
Name	Hits	Pop Hits	List Total	Pop Total	Genes	Pvalue	adjusted Pvalue(BH)
GO:0000932_P-body	7	116	86	12816	TNRC6B;TRIM71;DDX6;AGO1	0.0	0.0
GO:0005844_polysome	5	42	86	12816	FMR1;AGO1;MSI2	0.0	0.0
GO:0000118_histone_deacetylase_complex	5	54	86	12816	MIDEAS;CBX5;TBL1XR1;MBD2	0.0001	0.0003
GO:0005667_transcription_regulator_complex	5	203	86	12816	MIDEAS;TCF4;NR6A1;SIX4	0.0148	0.037
GO:0014069_postsynaptic_density	5	270	86	12816	PDE4B;FMR1;CPEB4;SEMA4C	0.0416	0.0832
GO:0005813_centrosome	7	631	86	12816	CAPRIN2;PDE4B;DDX3X;CAMSAP2;ZFYVE26;RRAGD	0.1486	0.2123
GO:0048471_perinuclear_region_of_cytoplasm	8	734	86	12816	PDE4B;RAB34;RAB40C;FMR1;CCNT2;DDX6;CPEB4;PPARG	0.1388	0.2123
GO:0032991_protein-containing_complex	7	679	86	12816	ESR1;CBX5;CDK8;PXK;IKZF4;MBD2	0.1894	0.2368
GO:0000139_Golgi_membrane	5	682	86	12816	ACER2;PPP6R3;CLCN3;SURF4;PLPP3	0.4901	0.5446
GO:0043231_intracellular_membrane-bounded_organelle	5	923	86	12816	OSBPL8;CLCN3;MSI2;PPARG;RRAGD	0.7392	0.7392

## Sheet: GO-MF
Name	Hits	Pop Hits	List Total	Pop Total	Genes	Pvalue	adjusted Pvalue(BH)
GO:0003729_mRNA_binding	9	222	100	15238	RBFOX2;PTBP3;FMR1;DDX3X;DDX6;QKI;MBD2;IGF2BP3;PURB	0.0	0.0
GO:0004879_nuclear_receptor_activity	6	81	100	15238	ESR1;NR6A1;PPARG	0.0	0.0
GO:0003714_transcription_corepressor_activity	9	245	100	15238	RBFOX2;PHF12;MIDEAS;HMGA2;TBL1XR1;MAP3K10;RLIM	0.0001	0.0005
GO:0046332_SMAD_binding	5	62	100	15238	ACVR1;TGFBR3;HMGA2;PURB	0.0001	0.0005
GO:0003677_DNA_binding	18	984	100	15238	NABP1;CREBZF;MIDEAS;TCF4;TET2;CRY2;SMARCAD1;ZNF268;NFIB;DDX3X;NR6A1;SMC1A;ARID3B;PHC3;PPARG;LBR	0.0003	0.0012
GO:0000976_transcription_regulatory_region_sequence-specific_DNA_binding	7	228	100	15238	CREBZF;CRY2;HMGA2;TBL1XR1;PPARG	0.0012	0.004
GO:0008134_transcription_factor_binding	8	310	100	15238	ESR1;RBFOX2;TXLNG;DDX3X;HMGA2;PPARG;NLK;PURB	0.0016	0.0046
GO:0003730_mRNA_3'-UTR_binding	5	171	100	15238	FMR1;CPEB4;IGF2BP3	0.0069	0.0153
GO:0004672_protein_kinase_activity	6	237	100	15238	WNK3;ACVR1;CDK8;MAP3K9;MAP3K10;NLK	0.0063	0.0153
GO:0001227_DNA-binding_transcription_repressor_activity,_RNA_polymerase_II-specific	7	335	100	15238	ZBTB4;ZNF566;MXD1;PPARG;ZBTB5;PURB	0.009	0.018
GO:0003682_chromatin_binding	8	439	100	15238	ESR1;CBX5;SMARCAD1;FMR1;CCNT2;SMC1A;PHC3;PPARG	0.0116	0.0211
GO:0001228_DNA-binding_transcription_activator_activity,_RNA_polymerase_II-specific	8	500	100	15238	ESR1;TCF4;ZNF268;NFIB;MDM4;NR6A1;PLAGL2;SIX4	0.0228	0.0351
GO:0003700_DNA-binding_transcription_factor_activity	8	497	100	15238	ESR1;TCF4;ZNF268;PPARG;IKZF4;PLAGL2	0.0221	0.0351
GO:0004674_protein_serinethreonine_kinase_activity	9	609	100	15238	WNK3;ACVR1;MAP3K9;MAP3K10;NLK	0.0256	0.0366
GO:0043565_sequence-specific_DNA_binding	5	264	100	15238	ZBTB4;NR6A1;PPARG;PLAGL2	0.0352	0.0469
GO:0003924_GTPase_activity	6	412	100	15238	RAB34;RAB40C;DDX3X;ARF6;RRAGD	0.0629	0.0786
GO:0005525_GTP_binding	6	427	100	15238	RAB34;RAB40C;ARF6;RRAGD	0.0717	0.0797
GO:0008270_zinc_ion_binding	10	854	100	15238	ESR1;TRIM71;TET2;TRIM2;MDM4;NR6A1;PHC3;PPARG;IKZF4;ZCCHC14	0.0688	0.0797
GO:0042803_protein_homodimerization_activity	8	689	100	15238	ACVR1;ZBTB4;FMR1;NR6A1;MAP3K9;MAP3K10;GRPEL2	0.0981	0.1033
GO:1990837_sequence-specific_double-stranded_DNA_binding	5	566	100	15238	ESR1;TCF4;NFIB;NR6A1;SIX4	0.325	0.325
